# Supplementary material for: A fluorescent probe for lipid droplet polarity imaging with low viscosity crosstalk
Source: Royal Society of Chemistry journal article supplement (doi:10.1039/d3an00551h), 2023-01-01
Supplement: d3an00551h1.pdf [file d3an00551h1.pdf]

## Supporting Information

### Fluorescent probe for lipid droplet polarity imaging with low viscosity crosstalk

Bo Lin<sup>a</sup>, Zhenru Li<sup>a</sup>, Qi Zan<sup>b</sup>, Li Fan<sup>b</sup>, Yang Shu<sup>a\*</sup>, Jianhua Wang<sup>a\*</sup>

<sup>a</sup> Department of Chemistry, College of Sciences, Northeastern University, Shenyang, 110819, China

<sup>b</sup> Institute of Environmental Science, Shanxi University, Taiyuan, 030006, China

E-mail address: [shuyang@mail.neu.edu.cn](mailto:shuyang@mail.neu.edu.cn) (Shu), [jianhuajrz@mail.neu.edu.cn](mailto:jianhuajrz@mail.neu.edu.cn) (Wang).

## Experimental

### Materials and Chemicals

2,6-naphthalenediol and N,N'-diphenylformamidine were purchased from Bide Pharmaceutical Technology Co., Ltd. (Shanghai). Oleic acid (OA) and methyl- $\beta$ -cyclodextrin (M $\beta$ CD) were obtained from Meryer (Shanghai) Chemical Technology Co., Ltd. Piperidine, toluene, acetone, sulfuric acid, acetic acid, 1,4-dioxane, H<sub>2</sub>O<sub>2</sub> (30%) and the silica gel of 200-400 mesh (the sorbent of column chromatography) were received from Sinopharm (Shenyang) Chemical Reagent Co., Ltd. 2-Benzothiazoleacetonitrile, lipopolysaccharide(LPS), the metal phosphate and potassium salt with various anions used in the selectivity evaluation were supplied by Aladdin (Shanghai) Reagent Co., Ltd. DNA and RNA used for the selectivity estimation were achieved from Sangon Biotech (Shanghai) Co., Ltd.. The culture mediums and fetal bovine serum (FBS) for cell culturing were supplied by Thermo Fisher Scientific (China) Co., Ltd.. Quinine was obtained from Macklin (Shanghai) Biochemical Technology Co., Ltd. Mito Tracker Deep Red were acquired from Invitrogen (China). Nystatin and erastin were provided by Med Chem Express (China). Glyceryl trioleate, Nile red, amino acids and the reagents for cell experiments were commercially available from Sigma Aldrich (China Mainland). The solvents used were supplied via Shanghai Titan Scientific Co., Ltd. All the reagents/chemicals and solvents are at least of analytical-reagent or HPLC grade and used without further purification. The cell lines were purchased from National Collection of Authenticated Cell Cultures (China).

### Instrumentation

Deionized water with resistivity of 18.2 M $\Omega$ ·cm<sup>-1</sup> (25°C) was produced by Milli-Q water purification system (Millipore) and used throughout the experiments. <sup>1</sup>H NMR (400 MHz) was acquired on a Bruker NMR spectrometer (Bruker biospin, Switzerland). d<sup>6</sup>-DMSO was used as solvent, tetramethylsilane (TMS) as an internal reference standard. 1260 Hip Degasser and 6540 UHD Accurate Mass QTOF tracking module (Agilent, USA) was employed for measuring mass spectra. UV-vis absorption spectra were recorded on a U-3900 double-beam UV-vis spectrophotometer (Hitachi High-

Techonologies Corporation, Japan). Fluorescence spectra were obtained using a RF-6000 spectrofluorometer (SHIMADZU Excellence in Science, Japan). A laser particle sizer (Malvern Nano-ZS90) was employed to implement the dynamic light scattering (DLS). Fluorescence imaging in live cells were implemented on a FV-1200 confocal laser scanning microscope (Olympus, Japan).

### Preparation and characterization

**BTHO** and the intermediates were prepared according to the synthetic route in Scheme S1.

#### *2,6-dihydroxy-1-naphthaldehyde:*

This compound was synthesized according to the previously reported process<sup>1</sup>. The mixture of 2,6-naphthalenediol (10 mmol, 1.602 g) and N,N'-diphenylformamidine (12 mmol, 2.355 g) was heated to 150°C and maintained for 10 h in a 35 mL thick-wall high-pressure bottle. The reaction mixture was dispersed in 30 mL acetone and sonicated for 30 min. Afterwards, filtered the dispersion system and collected the red-brown filter residue. The dried residue was mixed with 40 mL H<sub>2</sub>O/H<sub>2</sub>SO<sub>4</sub> at room temperature and stirred. After 4 days, 200 mL H<sub>2</sub>O was added to quench the reaction. The mixture was extracted with dichloromethane (DCM) for 3 times and the organic layer was dried with anhydrous Na<sub>2</sub>SO<sub>4</sub>. After removing the solvent under reduced pressure, the residue was purified via silica gel column chromatography with n-hexane/ethyl acetate (10/1, v/v) and n-hexane/ethyl acetate (5/1, v/v) as eluent in order. The yellow solid product (1.051 g, 89%) was acquired. <sup>1</sup>H NMR (600 MHz, d<sup>6</sup>-DMSO) δ 11.64 (s, 1H), 10.76 (s, 1H), 9.65 (s, 1H), 8.78 (d, *J* = 9.1 Hz, 1H), 7.94 (d, *J* = 9.1 Hz, 1H), 7.16 (ddd, *J* = 13.6, 6.8, 2.6 Hz, 3H). MS (Q-TOF) *m/z*: Calcd 188.1003, found 187.0925 [M]<sup>-</sup>.

#### *2-(benzothiazol-2-yl)-8-hydroxy-3H-benzochromen-3-one (BTHO):*

BTHO was prepared by a similar procedure reported by Sarkar<sup>2</sup>. 2,6-Dihydroxy-1-naphthaldehyde (1 mmol, 0.1880 g), 2-benzothiazoleacetonitrile (1.3 mmol, 0.2265 g), 2.12 mL piperidine and 12.16 mL ethanol were mixed in a 50 mL round bottom flask. Afterwards, the mixture was stirred at room temperature for 12 h. The reaction mixture

was filtered and the solid washed 3 times by 30 mL n-hexane. Thereafter, the dried solid was dissolved in 35 mL acetic acid and further refluxed for 3h. After removing acetic acid, the residue was purified by silica gel column chromatography with n-hexane/ethyl acetate (6/1, v/v) as eluent. The yellow solid product was obtained after drying at vacuum (0.1932 g, 56%).  $^1\text{H NMR}$  (600 MHz, DMSO)  $\delta$  10.12 (s, 1H), 9.76 (s, 1H), 8.56 (d,  $J = 9.1$  Hz, 1H), 8.21 (d,  $J = 7.9$  Hz, 1H), 8.15 (t,  $J = 8.2$  Hz, 2H), 7.70 (ddd,  $J = 31.8, 5.7, 3.3$  Hz, 1H), 7.65-7.57 (m, 2H), 7.50 (t,  $J = 7.5$  Hz, 1H), 7.39 (dd,  $J = 9.0, 2.4$  Hz, 1H), 7.35 (d,  $J = 2.2$  Hz, 1H). MS (Q-TOF)  $m/z$ : Calcd 344.0939, found 345.1017 [M] $^-$ .

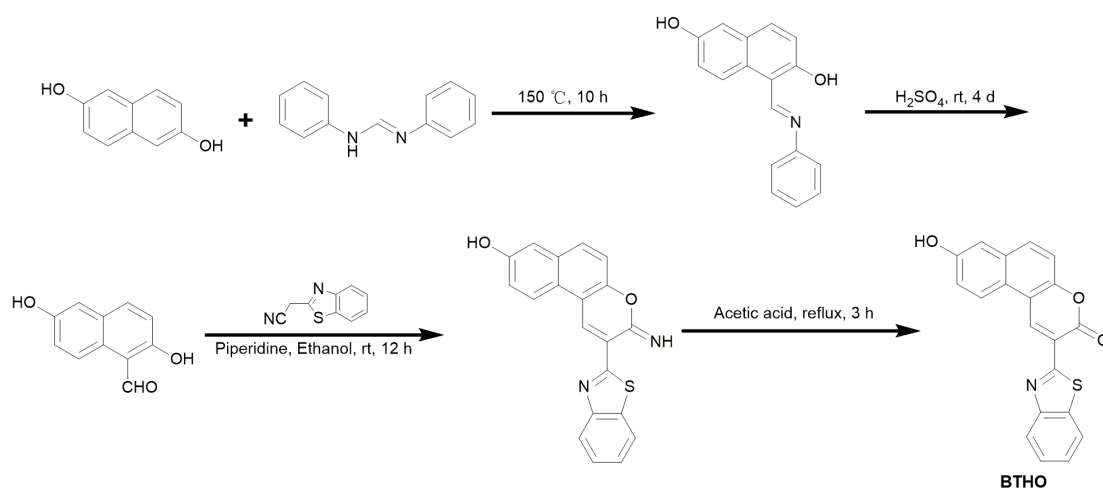

Scheme S1. Schematic illustration for the preparation of BTHO.

### Spectroscopic measurements

6.91 mg BTHO was dissolved in a small amount of DMSO (~ 10 mL) and the volume was adjusted to 20 mL for preparing 1.0 mM stock solution. Afterwards, the stock solution was stored at 4°C for future use. The stock solution of BTHO was diluted to 10  $\mu\text{M}$  with various solvents for measuring the absorption and fluorescence spectra. The resulting solutions were shaken for 12 h and then kept still for 2 h. 3 mL of the above solutions were placed in a quartz optical cell with a 1 cm optical path length, after which the absorption and fluorescence spectra were recorded. For measuring the fluorescence of BTHO, the excitation and emission bandwidths were both set at 5.0 nm. All spectroscopic experiments were carried out at room temperature. The excitation and emission wavelengths were the corresponding optimal values in the assessing the effect

of solvation on BTHO's fluorescence. In other fluorescence measurement, the excitation wavelength was all fixed at 405 nm to match the cell imaging.

The samples for evaluating the effect of polarity on BTHO's absorption and emission spectra were obtained by mixing DMSO and 1,4-dioxane in different volume proportions. In addition, these absorption and emission spectra of BTHO were also measured in the mixed systems of DMSO and toluene, water and 1,4-dioxane, and water and DMSO, respectively, for confirming the established relationship between the fluorescence and polarity of BTHO.

The solutions of interfering substances for selectivity test were freshly prepared by using the solution containing 10  $\mu\text{M}$  BTHO. PB/DMSO (1:1, v/v) with 0.01 M phosphate and pH 7.40 were selected as solvent for acquiring sufficient fluorescence intensities of the probe and solubility of interfering substances. The cations and anions were derived from their phosphate and potassium salts, respectively. Among them, the concentrations of  $\text{Na}^+$  and  $\text{K}^+$  were 10 mM and 140 mM respectively, and the concentrations of other ions were 1 mM. The concentrations of all DNA were 100  $\mu\text{M}$ . The concentrations of RNA-1 and RNA-2 were 10 and 50  $\mu\text{M}$ , respectively. The concentrations of proteins were fixed at 1 mg/L. The fluorescence intensities at 493 nm were recorded at stabilization.

The  $\text{H}_2\text{O}/\text{DMSO}$  (1/1, v/v), DMSO, ethyl acetate (EA), toluene and 1,4-dioxane solutions of 10  $\mu\text{M}$  BTHO were selected for assessing its photostability. The time-dependent fluorescence intensity at maximum emission wavelength was simultaneously collected with 1.08 s intervals during 3 h under continuous light irradiation. The power of the Xenon Lamp is 150 W.

### Calculation of fluorescence quantum yield

The relative quantum yield of BTHO was calculated according to the following equation:

$$\Phi_x = \Phi_{st} \times \frac{D_x}{D_{st}} \times \frac{A_{st}}{A_x} \times \frac{n_{Dx}^2}{n_{Dst}^2} \quad (\text{S1})$$

Where  $\Phi_{st}$ , D, A and  $n_D$  represent the reported quantum yield of the standard, the

integrated fluorescence intensity of the emission spectra, the absorbance at the excitation wavelength and the refractive index of the solvent used, respectively. Subscripts  $x$  and  $st$  stand for the sample and the standard, respectively. Quinine sulfate solution ( $\Phi = 0.54$  in 0.1 M H<sub>2</sub>SO<sub>4</sub>) is used as reference standard.

### **Measurement of hydration diameter**

The stock solution of the probe was diluted to 10  $\mu$ M by water and shocking 2 h. Then, the mixture was rested again for 2 h and used for detection of dynamic light scattering (DLS). The hydrated particle sizes were recorded on a laser particle sizer.

### **Cytotoxicity assay of BTHO**

BTHO cytotoxicity to NCM 460 cells (Human normal intestinal epithelial cells) was evaluated by MTT (3-(4,5-dimethylthiazol-2-yl)-2,5-diphenyltetrazolium bromide) assay. NCM460 cells were transplanted in 96-well flat-bottomed plates and cultured in 1640 medium containing 10% (v/v) FBS at the atmosphere of 5% CO<sub>2</sub> and 37°C. The total volume in each well was controlled at 200  $\mu$ L, and a cell density of  $1 \times 10^5$  cells per well was maintained. After 24 h, the medium was removed and these cells were washed with PBS for 3 times. 1  $\mu$ L of BTHO (DMSO) with different concentrations (0, 0.005, 0.02, 0.2, 1, 2, 3, 4, 5, 6 mM) were mixed with 199  $\mu$ L 1640 medium. Then, these culture mediums were perfused to each well and incubated with the cells for 24 h. 10  $\mu$ L of MTT solutions (10 mg/mL) were added into each well and further incubated for 4 h. Subsequently, these culture mediums were removed and 150  $\mu$ L of DMSO was added into each well to dissolve the blue-violet formazan crystals produced with the cells. The absorbance at 490 nm was recorded on a microplate reader.

### **Dynamic assays of cells stained by BTHO**

NCM460 cells were seeded in glass Petri dish and cultured in 1640 medium containing 10% FBS at 37°C in 5% CO<sub>2</sub> atmosphere for 24 h. Afterwards, the medium was removed and the cells were washed for 3 times via PBS. Then, 5  $\mu$ L stock solution of BTHO (1.0 mM) was added into the glass petri dish containing 1.0 mL Hanks medium (Hanks balanced salt solution, HBSS) with a final concentration of 5  $\mu$ M. Subsequently, the time-dependent fluorescence images of BTHO in the cyan channel

was collected at  $\lambda_{\text{ex}}/\lambda_{\text{em}} = 405/(440-540)$  nm. The imaging was conducted with the frequency of times/(1 min) during 20 min on a FV-1200 confocal laser scanning microscope with 100× objective lens.

### **Photostability evaluation of the probe in live cells**

NCM460 cells were transplanted in glass Petri dish and incubated in 1640 medium supplemented with 10% FBS at 37°C in 5% CO<sub>2</sub> atmosphere for 24 h. Then, the redundant culture medium was cleaned and the cells were rinsed for 3 times by PBS. Subsequently, 5 µL of the stock solution of BTHO was poured into the petri dish containing 1.0 mL Hanks medium with a final concentration of 5 µM. After 30 min, the continuous fluorescence imaging was implemented. The images in the cyan channel with 440-540 nm were collected 100 times with 30 s intervals during 50 min under continuous laser radiation of 405 nm on a FV-1200 confocal laser scanning microscope with 100× objective lens. Fixed 405 laser power: 50×25% = 12.5 mW.

**The physical parameters of solvents and photo-physical properties of BTMO in these solvents**

Table S1. The physical parameters of solvents at 20°C.

| Solvent     | $\epsilon^{[a]}$ | $n_D^{2[b]}$ | $\Delta f^{[c]}$ | $\eta^{[d]}$ (mPa·s) |
|-------------|------------------|--------------|------------------|----------------------|
| Water       | 80.20            | 1.7769       | 0.4054           | 1.00                 |
| DMSO        | 46.60            | 2.1845       | 0.3738           | 2.47                 |
| Glycerol    | 46.50            | 2.1697       | 0.3745           | 1499                 |
| DMF         | 38.25            | 2.0449       | 0.3795           | 0.90                 |
| Ethanol     | 24.55            | 1.8523       | 0.3744           | 1.17                 |
| Acetone     | 20.70            | 1.8469       | 0.3199           | 0.32                 |
| DCM         | 9.08             | 2.0306       | 0.2924           | 0.43                 |
| EA          | 6.02             | 1.8824       | 0.1424           | 0.45                 |
| Toluene     | 2.39             | 2.2410       | 0.1222           | 0.59                 |
| 1,4-Dioxane | 2.21             | 2.0164       | 0.4054           | 1.3                  |

[a] The dielectric constant of solvents. [b]  $n_D$  is the refractive indices of solvents. [c]  $\Delta f = \frac{\epsilon-1}{2\epsilon+1} -$

$\frac{n_D^2-1}{4n_D^2+2}$  is the orientational polarizability of solvents. [d] The viscosity of solvents.



Table S2. Photo-physical properties of BTMO in various solvents at 20°C.

| <b>Solvent</b>        | $\lambda_{\text{abs}}^{[e]}$<br>(nm) | $\epsilon_{\text{max}}^{[f]}$<br>(M <sup>-1</sup> cm <sup>-1</sup> ) | $\lambda_{\text{em}}^{[g]}$<br>(nm) | <b>Stokes Shift</b><br>(nm) | $\Phi_{\text{f}}^{[h]}$ | $\epsilon \times \Phi_{\text{f}}^{[i]}$<br>(M <sup>-1</sup> cm <sup>-1</sup> ) |
|-----------------------|--------------------------------------|----------------------------------------------------------------------|-------------------------------------|-----------------------------|-------------------------|--------------------------------------------------------------------------------|
| DMSO                  | 425                                  | 33660                                                                | 515                                 | 90                          | 0.01                    | 673                                                                            |
| Glycerol              | 423                                  | 34650                                                                | 512                                 | 89                          | 0.17                    | 5891                                                                           |
| DMF                   | 423                                  | 34650                                                                | 511                                 | 88                          | 0.04                    | 1386                                                                           |
| Ethanol               | 422                                  | 35310                                                                | 505                                 | 83                          | 0.03                    | 1059                                                                           |
| Acetone               | 420                                  | 36630                                                                | 500                                 | 80                          | 0.37                    | 13553                                                                          |
| DCM                   | 420                                  | 39270                                                                | 502                                 | 82                          | 0.67                    | 26311                                                                          |
| EA                    | 418                                  | 39600                                                                | 492                                 | 74                          | 0.64                    | 25344                                                                          |
| Toluene               | 421                                  | 40260                                                                | 493                                 | 72                          | 0.80                    | 32208                                                                          |
| 1,4-Dioxane           | 418                                  | 40590                                                                | 488                                 | 70                          | 0.94                    | 38155                                                                          |
| Glyceryl<br>Trioleate | 421                                  | 40260                                                                | 493                                 | 72                          | -                       | -                                                                              |

<sup>[e]</sup> The maximal absorption wavelength of the probe. <sup>[f]</sup> The extinction coefficient of the probe at the maximum absorption. <sup>[g]</sup> The maximal emission of the probe. <sup>[h]</sup>  $\Phi_{\text{f}}$  is the relative fluorescence quantum yield derived with quinine sulfate ( $\Phi_{\text{f}} = 0.54$  in 0.1 M H<sub>2</sub>SO<sub>4</sub>) as a fluorescence standard <sup>3</sup>. <sup>[i]</sup>  $\epsilon \times \Phi_{\text{f}}$  represent for molecular brightness<sup>4</sup>.

Table S3. The physical parameters of DMSO/1,4-Dioxane mixed solvents at 20°C.

| %DMSO (Vol) | %1,4-Dioxane (Vol) | $\epsilon_{mix}^{[j]}$ | $n_{Dmix}^{2[k]}$ | $\Delta f_{mix}^{[l]}$ |
|-------------|--------------------|------------------------|-------------------|------------------------|
| 100         | 0                  | 46.60                  | 1.7769            | 0.3738                 |
| 95          | 5                  | 44.38                  | 1.7889            | 0.3734                 |
| 90          | 10                 | 42.16                  | 1.8008            | 0.3730                 |
| 85          | 15                 | 39.94                  | 1.8128            | 0.3725                 |
| 80          | 20                 | 37.72                  | 1.8248            | 0.3718                 |
| 75          | 25                 | 35.50                  | 1.8368            | 0.3711                 |
| 70          | 30                 | 33.28                  | 1.8487            | 0.3702                 |
| 65          | 35                 | 31.06                  | 1.8607            | 0.3691                 |
| 60          | 40                 | 28.84                  | 1.8727            | 0.3677                 |
| 55          | 45                 | 26.62                  | 1.8847            | 0.3661                 |
| 50          | 50                 | 24.40                  | 1.8966            | 0.3641                 |
| 45          | 55                 | 22.18                  | 1.9086            | 0.3616                 |
| 40          | 60                 | 19.97                  | 1.9206            | 0.3585                 |
| 35          | 65                 | 17.75                  | 1.9326            | 0.3545                 |
| 30          | 70                 | 15.53                  | 1.9445            | 0.3493                 |
| 25          | 75                 | 13.31                  | 1.9565            | 0.3423                 |
| 20          | 80                 | 11.09                  | 1.9685            | 0.3323                 |
| 15          | 85                 | 8.87                   | 1.9805            | 0.3175                 |
| 10          | 90                 | 6.65                   | 1.9924            | 0.2931                 |
| 5           | 95                 | 4.43                   | 2.0044            | 0.2464                 |
| 0           | 100                | 2.21                   | 2.0164            | 0.1222                 |

<sup>[j]</sup> The dielectric constant of mixed solvents. <sup>[k]</sup>  $n_{Dmix}$  stands for the refractive indices of mixed solvents. <sup>[l]</sup> The orientational polarizability of mixed solvents.

Table S4. The physical parameters of DMSO/Toluene mixed solvents at 20 °C.

| <b>%DMSO (Vol)</b> | <b>%Toluene (Vol)</b> | $\epsilon_{mix}$ | $n_{Dmix}^2$ | $\Delta f_{mix}$ |
|--------------------|-----------------------|------------------|--------------|------------------|
| 100                | 0                     | 46.60            | 2.1845       | 0.3738           |
| 95                 | 5                     | 44.40            | 2.1873       | 0.3728           |
| 90                 | 10                    | 42.20            | 2.1901       | 0.3718           |
| 85                 | 15                    | 40.00            | 2.1930       | 0.3707           |
| 80                 | 20                    | 37.79            | 2.1958       | 0.3695           |
| 75                 | 25                    | 35.59            | 2.1986       | 0.3682           |
| 70                 | 30                    | 33.39            | 2.2014       | 0.3667           |
| 65                 | 35                    | 31.19            | 2.2043       | 0.3650           |
| 60                 | 40                    | 28.99            | 2.2071       | 0.3631           |
| 55                 | 45                    | 26.79            | 2.2099       | 0.3609           |
| 50                 | 50                    | 24.58            | 2.2127       | 0.3583           |
| 45                 | 55                    | 22.38            | 2.2156       | 0.3553           |
| 40                 | 60                    | 20.18            | 2.2184       | 0.3517           |
| 35                 | 65                    | 17.98            | 2.2212       | 0.3472           |
| 30                 | 70                    | 15.78            | 2.2241       | 0.3416           |
| 25                 | 75                    | 13.58            | 2.2269       | 0.3342           |
| 20                 | 80                    | 11.37            | 2.2297       | 0.3242           |
| 15                 | 85                    | 9.17             | 2.2325       | 0.3097           |
| 10                 | 90                    | 6.97             | 2.2354       | 0.2867           |
| 5                  | 95                    | 4.77             | 2.2382       | 0.2446           |
| 0                  | 100                   | 2.57             | 2.2410       | 0.1424           |

Table S5. The physical parameters of H<sub>2</sub>O/1,4-Dioxane mixed solvents at 20 °C.

| %H <sub>2</sub> O (Vol) | %1,4-Dioxane (Vol) | $\epsilon_{mix}$ | $n_{Dmix}^2$ | $\Delta f_{mix}$ |
|-------------------------|--------------------|------------------|--------------|------------------|
| 100                     | 0                  | 80.20            | 1.7769       | 0.4054           |
| 95                      | 5                  | 76.30            | 1.7889       | 0.4041           |
| 90                      | 10                 | 72.40            | 1.8008       | 0.4027           |
| 85                      | 15                 | 68.50            | 1.8128       | 0.4013           |
| 80                      | 20                 | 64.60            | 1.8248       | 0.3998           |
| 75                      | 25                 | 60.70            | 1.8368       | 0.3982           |
| 70                      | 30                 | 56.80            | 1.8487       | 0.3966           |
| 65                      | 35                 | 52.90            | 1.8607       | 0.3948           |
| 60                      | 40                 | 49.00            | 1.8727       | 0.3929           |
| 55                      | 45                 | 45.10            | 1.8847       | 0.3908           |
| 50                      | 50                 | 41.20            | 1.8966       | 0.3885           |
| 45                      | 55                 | 37.30            | 1.9086       | 0.3859           |
| 40                      | 60                 | 33.41            | 1.9206       | 0.3828           |
| 35                      | 65                 | 29.51            | 1.9326       | 0.3792           |
| 30                      | 70                 | 25.61            | 1.9445       | 0.3747           |
| 25                      | 75                 | 21.71            | 1.9565       | 0.3689           |
| 20                      | 80                 | 17.81            | 1.9685       | 0.3609           |
| 15                      | 85                 | 13.91            | 1.9805       | 0.3491           |
| 10                      | 90                 | 10.01            | 1.9924       | 0.3291           |
| 5                       | 95                 | 6.11             | 2.0044       | 0.2862           |
| 0                       | 100                | 2.21             | 2.0164       | 0.1222           |

Table S6. The physical parameters of H<sub>2</sub>O/DMSO mixed solvents at 20 °C.

| <b>%H<sub>2</sub>O (Vol)</b> | <b>%DMSO (Vol)</b> | $\epsilon_{mix}$ | $n_{Dmix}^2$ | $\Delta f_{mix}$ |
|------------------------------|--------------------|------------------|--------------|------------------|
| 100                          | 0                  | 80.20            | 1.7769       | 0.4054           |
| 90                           | 10                 | 76.84            | 1.8176       | 0.4021           |
| 80                           | 20                 | 73.48            | 1.8584       | 0.3989           |
| 70                           | 30                 | 70.12            | 1.8992       | 0.3957           |
| 60                           | 40                 | 66.76            | 1.9399       | 0.3925           |
| 50                           | 50                 | 63.40            | 1.9807       | 0.3894           |
| 40                           | 60                 | 60.04            | 2.0214       | 0.3863           |
| 30                           | 70                 | 56.68            | 2.0622       | 0.3832           |
| 20                           | 80                 | 53.32            | 2.1030       | 0.3801           |
| 10                           | 90                 | 49.96            | 2.1437       | 0.3770           |
| 0                            | 100                | 46.60            | 2.1845       | 0.3738           |

**Molecule coordinates of BTHO from output results of the Gaussian 09 package and Lippert-Metaga equation**

Table S7. Molecule coordinates of BTHO in DMSO, ground state.

| Number | Atomic Number | X           | Y           | Z           |
|--------|---------------|-------------|-------------|-------------|
| 1      | 6             | 4.22757400  | 0.36981200  | 0.03775500  |
| 2      | 6             | 2.94836900  | -0.27379200 | 0.05678100  |
| 3      | 6             | 1.75835000  | 0.54272800  | -0.00941800 |
| 4      | 6             | 1.89873200  | 1.92812000  | -0.08877700 |
| 5      | 6             | 3.15800100  | 2.56402000  | -0.10446400 |
| 6      | 6             | 4.29177600  | 1.79434000  | -0.04300200 |
| 7      | 6             | 5.41034600  | -0.40260800 | 0.09717300  |
| 8      | 6             | 5.34555700  | -1.78143500 | 0.17404500  |
| 9      | 6             | 4.08554500  | -2.42459900 | 0.19482400  |
| 10     | 6             | 2.92132900  | -1.68663300 | 0.13727300  |
| 11     | 8             | 6.51547800  | -2.48028300 | 0.22752500  |
| 12     | 6             | 0.42415900  | 0.03745500  | 0.01112100  |
| 13     | 6             | -0.67966400 | 0.84904100  | -0.05074000 |
| 14     | 6             | -0.50556900 | 2.30198200  | -0.15503800 |
| 15     | 8             | 0.81186000  | 2.74630700  | -0.15560600 |
| 16     | 8             | -1.36350400 | 3.15194000  | -0.25465600 |
| 17     | 6             | -2.03819800 | 0.29687300  | -0.03198000 |
| 18     | 7             | -3.09205400 | 0.90180800  | 0.42648100  |
| 19     | 6             | -4.22164000 | 0.10938300  | 0.32520700  |
| 20     | 6             | -4.02040800 | -1.17253600 | -0.24535200 |
| 21     | 16            | -2.33387400 | -1.35158700 | -0.67713600 |
| 22     | 12            | -5.50764800 | 0.48645700  | 0.74508300  |
| 23     | 12            | -6.55693000 | -0.41076100 | 0.58778500  |
| 24     | 12            | -6.34299200 | -1.67959700 | 0.01829300  |
| 25     | 12            | -5.07527600 | -2.07513800 | -0.40342300 |
| 26     | 1             | 3.20082700  | 3.64591800  | -0.16625200 |
| 27     | 1             | 5.26808800  | 2.27049400  | -0.05614200 |
| 28     | 1             | 6.37855000  | 0.08860800  | 0.08121000  |
| 29     | 1             | 4.03653000  | -3.50912400 | 0.25520000  |
| 30     | 1             | 1.97616400  | -2.21823800 | 0.15389400  |
| 31     | 1             | 6.32568200  | -3.43176900 | 0.26955000  |
| 32     | 1             | 0.27168000  | -1.03303500 | 0.09920200  |
| 33     | 1             | -5.65997700 | 1.46757000  | 1.18404200  |
| 34     | 1             | -7.55607400 | -0.13053000 | 0.90803900  |
| 35     | 1             | -7.17833200 | -2.36428900 | -0.09549700 |
| 36     | 1             | -4.91594900 | -3.05525900 | -0.84141500 |

Table S8. Molecule coordinates of BTHO in DMSO and excited state.

| Number | Atomic Number | X           | Y           | Z           |
|--------|---------------|-------------|-------------|-------------|
| 1      | 6             | 4.22403700  | 0.39160300  | -0.00028400 |
| 2      | 6             | 2.94674500  | -0.26197700 | 0.00007600  |
| 3      | 6             | 1.73968600  | 0.53050700  | 0.00000300  |
| 4      | 6             | 1.89934700  | 1.95335200  | -0.00032000 |
| 5      | 6             | 3.14454600  | 2.57856600  | -0.00063000 |
| 6      | 6             | 4.30166200  | 1.81271800  | -0.00064400 |
| 7      | 6             | 5.39693600  | -0.38818800 | -0.00025900 |
| 8      | 6             | 5.33427600  | -1.78948400 | 0.00015900  |
| 9      | 6             | 4.08501700  | -2.43833400 | 0.00059000  |
| 10     | 6             | 2.92672900  | -1.68023700 | 0.00053500  |
| 11     | 8             | 6.50989700  | -2.45214400 | 0.00019400  |
| 12     | 6             | 0.43379500  | 0.02111200  | 0.00020000  |
| 13     | 6             | -0.71137400 | 0.86556100  | 0.00027300  |
| 14     | 6             | -0.51831800 | 2.31084600  | 0.00031300  |
| 15     | 8             | 0.81112500  | 2.77071000  | -0.00034500 |
| 16     | 8             | -1.35152400 | 3.19248000  | 0.00078700  |
| 17     | 6             | -2.03316000 | 0.33261600  | 0.00023900  |
| 18     | 7             | -3.17794400 | 0.99712800  | 0.00048900  |
| 19     | 6             | -4.25801300 | 0.16602300  | 0.00024000  |
| 20     | 6             | -3.97772900 | -1.23697300 | -0.00025500 |
| 21     | 16            | -2.24897900 | -1.47913700 | -0.00040900 |
| 22     | 12            | -5.60561800 | 0.59070800  | 0.00039000  |
| 23     | 12            | -6.61570700 | -0.35901000 | 0.00006000  |
| 24     | 12            | -6.31909200 | -1.73848100 | -0.00041700 |
| 25     | 12            | -4.99794800 | -2.18732100 | -0.00057900 |
| 26     | 1             | 3.18347900  | 3.66282900  | -0.00085400 |
| 27     | 1             | 5.27552400  | 2.29219900  | -0.00091400 |
| 28     | 1             | 6.37112400  | 0.09074400  | -0.00055000 |
| 29     | 1             | 4.03153300  | -3.52307900 | 0.00099600  |
| 30     | 1             | 1.97867400  | -2.20621000 | 0.00089600  |
| 31     | 1             | 6.35613000  | -3.41283500 | 0.00045300  |
| 32     | 1             | 0.28450700  | -1.05063100 | 0.00051700  |
| 33     | 1             | -5.82572900 | 1.65376800  | 0.00076200  |
| 34     | 1             | -7.65363900 | -0.03853300 | 0.00016500  |
| 35     | 1             | -7.12866700 | -2.46232100 | -0.00065200 |
| 36     | 1             | -4.77454500 | -3.24964500 | -0.00093700 |

Table S9. Molecule coordinates of BTHO in 1,4-dioxane and ground state.

| Number | Atomic Number | X           | Y           | Z           |
|--------|---------------|-------------|-------------|-------------|
| 1      | 6             | 4.14286800  | 0.35466900  | 0.10691200  |
| 2      | 6             | 2.87691800  | -0.29016500 | 0.10077700  |
| 3      | 6             | 1.69922800  | 0.51846400  | 0.08102700  |
| 4      | 6             | 1.81624700  | 1.91889800  | 0.05123000  |
| 5      | 6             | 3.06613600  | 2.52979200  | 0.06900100  |
| 6      | 6             | 4.21990200  | 1.75336100  | 0.09408600  |
| 7      | 6             | 5.32593800  | -0.40304400 | 0.12808900  |
| 8      | 6             | 5.28886600  | -1.79514700 | 0.14052800  |
| 9      | 6             | 4.06561600  | -2.44843600 | 0.13049800  |
| 10     | 6             | 2.87981500  | -1.70839700 | 0.11019200  |
| 11     | 8             | 6.44144600  | -2.50726200 | 0.16230800  |
| 12     | 6             | 0.34318200  | -0.04162100 | 0.12242200  |
| 13     | 6             | -0.69420400 | 0.77664900  | -0.07720500 |
| 14     | 6             | -0.52130400 | 2.23966700  | -0.32237800 |
| 15     | 8             | 0.75103900  | 2.78045300  | 0.04508700  |
| 16     | 8             | -1.39749800 | 2.92096600  | -0.79921900 |
| 17     | 6             | -1.93039400 | 0.26774400  | -0.05673400 |
| 18     | 7             | -2.77582500 | 0.54615200  | 0.90860700  |
| 19     | 6             | -3.97298700 | -0.11284900 | 0.67601300  |
| 20     | 6             | -4.01320100 | -0.89295600 | -0.48302000 |
| 21     | 16            | -2.49275000 | -0.78032000 | -1.28746700 |
| 22     | 12            | -5.11923000 | -0.05786700 | 1.49496400  |
| 23     | 12            | -6.26514200 | -0.77670400 | 1.13876100  |
| 24     | 12            | -6.28217800 | -1.54677900 | -0.01990600 |
| 25     | 12            | -5.15897700 | -1.61876700 | -0.85001900 |
| 26     | 1             | 3.14190200  | 3.62716400  | 0.06321200  |
| 27     | 1             | 5.20462800  | 2.24348100  | 0.10397100  |
| 28     | 1             | 6.29786400  | 0.11204200  | 0.13495900  |
| 29     | 1             | 4.02847000  | -3.54777900 | 0.13851200  |
| 30     | 1             | 1.91850200  | -2.24299600 | 0.10123400  |
| 31     | 1             | 6.21103600  | -3.45154100 | 0.16804500  |
| 32     | 1             | 0.18411300  | -1.11309000 | 0.31386700  |
| 33     | 1             | -5.11248000 | 0.54914100  | 2.41229400  |
| 34     | 1             | -7.15862700 | -0.73286400 | 1.77888700  |
| 35     | 1             | -7.19095400 | -2.10628500 | -0.28651100 |
| 36     | 1             | -5.17216700 | -2.22755100 | -1.76610100 |



Table S10. Molecule coordinates of BTHO in 1,4-dioxane and excited state.

| Number | Atomic Number | X           | Y           | Z           |
|--------|---------------|-------------|-------------|-------------|
| 1      | 6             | 4.25086700  | 0.38299600  | -0.01826700 |
| 2      | 6             | 2.97376600  | -0.27281200 | 0.11204300  |
| 3      | 6             | 1.76277300  | 0.49631100  | 0.07960800  |
| 4      | 6             | 1.91498100  | 1.91505000  | -0.09461700 |
| 5      | 6             | 3.15458900  | 2.53936700  | -0.25287400 |
| 6      | 6             | 4.32205200  | 1.79465800  | -0.20504600 |
| 7      | 6             | 5.41481900  | -0.40062500 | 0.03142700  |
| 8      | 6             | 5.35106500  | -1.80103400 | 0.19370900  |
| 9      | 6             | 4.10538500  | -2.45541200 | 0.30765300  |
| 10     | 6             | 2.95758300  | -1.69402900 | 0.26536400  |
| 11     | 8             | 6.53233300  | -2.44154200 | 0.22480100  |
| 12     | 6             | 0.45468800  | -0.01618800 | 0.18690500  |
| 13     | 6             | -0.67487500 | 0.82417000  | 0.06909300  |
| 14     | 6             | -0.51131900 | 2.23940600  | -0.11503200 |
| 15     | 8             | 0.82578900  | 2.72615700  | -0.07703300 |
| 16     | 8             | -1.33912000 | 3.08940400  | -0.37442400 |
| 17     | 6             | -2.04237800 | 0.29206000  | 0.04611400  |
| 18     | 7             | -3.06636300 | 0.78091300  | 0.69154800  |
| 19     | 6             | -4.21196300 | 0.05274200  | 0.46244700  |
| 20     | 6             | -4.06957000 | -1.08480900 | -0.38292300 |
| 21     | 16            | -2.40444100 | -1.18818000 | -0.92351900 |
| 22     | 12            | -5.47115900 | 0.34333200  | 1.01877800  |
| 23     | 12            | -6.54599400 | -0.48402400 | 0.72613900  |
| 24     | 12            | -6.39044500 | -1.60570400 | -0.11223600 |
| 25     | 12            | -5.15205200 | -1.91648200 | -0.67170600 |
| 26     | 1             | 3.16903400  | 3.61454600  | -0.38762700 |
| 27     | 1             | 5.28988200  | 2.27193600  | -0.30409900 |
| 28     | 1             | 6.39331100  | 0.05765800  | -0.05666700 |
| 29     | 1             | 4.05667800  | -3.53319700 | 0.42188600  |
| 30     | 1             | 2.00734700  | -2.20591800 | 0.34559600  |
| 31     | 1             | 6.40268200  | -3.39942800 | 0.33625600  |
| 32     | 1             | 0.28815000  | -1.07245300 | 0.34878400  |
| 33     | 1             | -5.57522600 | 1.21112200  | 1.66006100  |
| 34     | 1             | -7.52237300 | -0.26564300 | 1.14672500  |
| 35     | 1             | -7.24567200 | -2.23843100 | -0.32619900 |
| 36     | 1             | -5.03710800 | -2.78170100 | -1.31547000 |

Lippert-Metaga equation<sup>5</sup>:

$$hc\tilde{\nu}_{max} = -\frac{2\mu_e(\mu_e-\mu_g)}{a^3}\Delta f + C \quad (S2)$$

Where  $h$ ,  $c$ ,  $\tilde{\nu}_{max}$ ,  $\mu_e$  and  $\mu_g$  are Planck constant, the light speed in vacuum, the solvent-equilibrated fluorescence maxima (wave number), the dipole moments of excited state and the dipole moments of ground state, respectively.  $\Delta f$  is the orientational polarizability of solvents described above and is positively correlated to the dielectric constant  $\epsilon$ .  $a$  and  $C$  represent the Onsager cavity radius and a constant, separately. Here, the mean solute polarizabilities in the excited and ground states were neglected.

### The FRET efficiency from BTHO to Nile red in living cells

Table S11. Fluorescence intensities of BTHO before and after added Nile red (**Fig. 4**), as well as the FRET efficiency in living cells.

| Number | $F_D$ (0 min) | $F_{DA}$ (18 min) | $E_{\text{FRET}}$ | Average $E_{\text{FRET}}$ |
|--------|---------------|-------------------|-------------------|---------------------------|
| 1      | 48.59         | 0.09              | 0.97              |                           |
| 2      | 58.53         | 3.14              | 0.95              | $0.96 \pm 0.01$           |
| 3      | 51.89         | 0.133             | 0.97              |                           |

The FRET efficiency ( $E_{\text{FRET}}$ ) was quantified by following equation<sup>6,7</sup>:

$$E_{\text{FRET}} = \frac{\alpha R_0^6}{\alpha R_0^6 + R^6} = 1 - \frac{F_{DA}}{F_D} \quad (\text{S3})$$

$E_{\text{FRET}}$  is obtained by measuring fluorescence intensities ( $F$ ) of the donor in the presence ( $F_{DA}$ ) and absence ( $F_D$ ) of the acceptor;  $R$  ( $\text{\AA}$ ) stands for the separation distance between the donor and acceptor, Förster distance ( $R_0$ ,  $\text{\AA}$ ) is the separation distance ( $R$ ) of a single FRET pair corresponding to 50% energy transfer efficiency.  $\alpha$  represents for the number of acceptor.

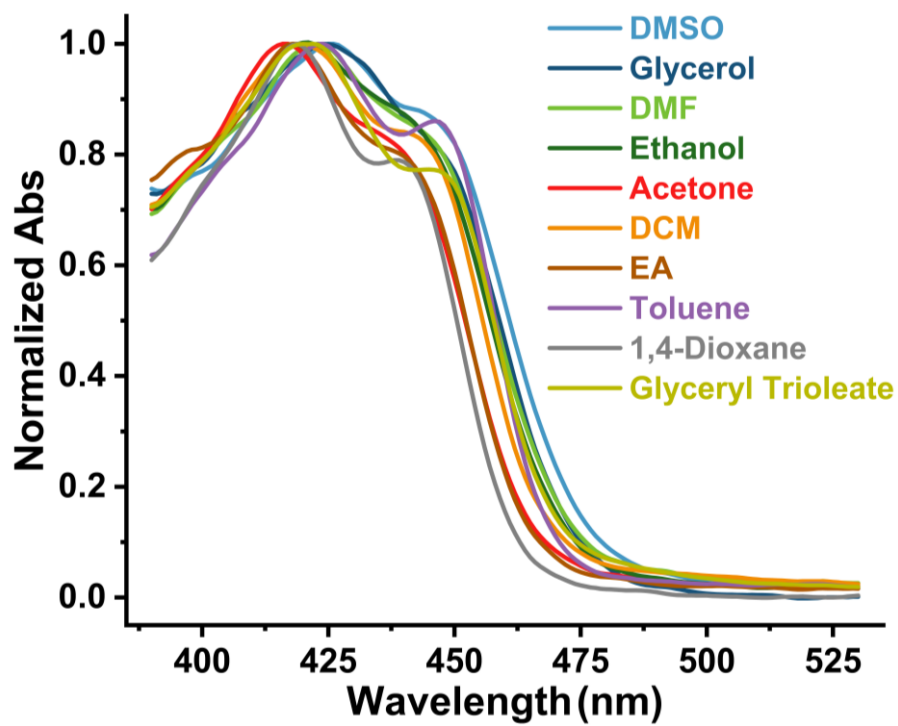

Fig. S1 UV-vis absorption spectra of BTHO (10  $\mu$ M) in various solvents.

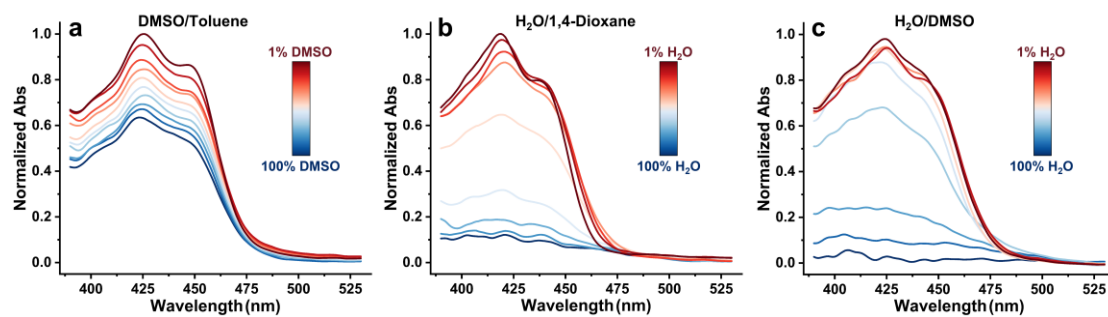

**Fig. S2** UV-vis absorption spectra of BTMO (10  $\mu\text{M}$ ) in various mixture systems: (a) DMSO/Toluene; (b) H<sub>2</sub>O/1,4-Dioxane; (c) H<sub>2</sub>O/DMSO.

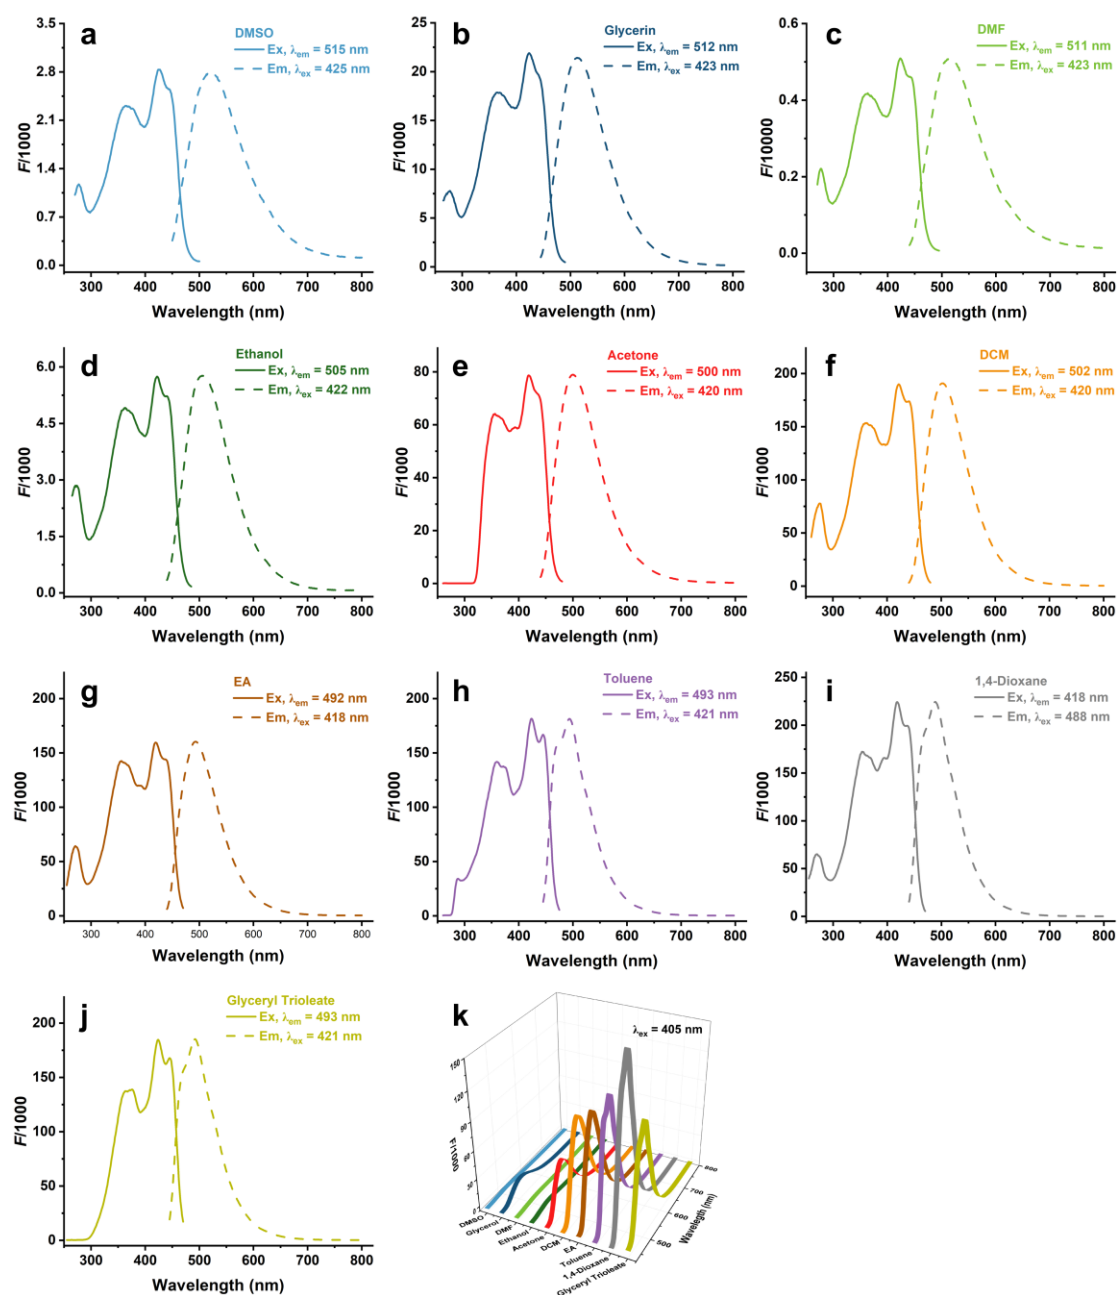

**Fig. S3** Excitation and emission spectra of BTHO (10  $\mu\text{M}$ ) in various solvents. (a), DMSO; (b), Glycerin; (c), DMF; (d), Ethanol; (e), Acetone; (f), DCM, ( $\text{CH}_2\text{Cl}_2$ ); (g), EA (ethyl acetate); (h), Toluene; (i), 1,4-Dioxane; (j), Glyceryl Trioleate. (k) The emission spectra of BTHO (10  $\mu\text{M}$ ) in the above solvents upon  $\lambda_{\text{ex}} = 405$  nm.

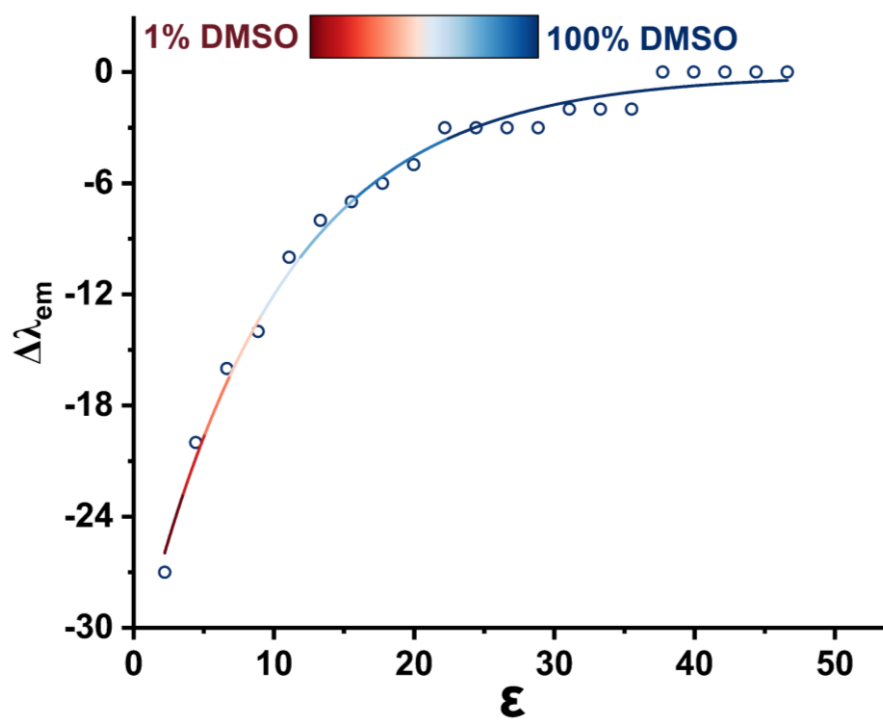

**Fig. S4** Boltzmann function fitting curve of  $\Delta\lambda_{em}$  vs. the dielectric constant.  $\Delta\lambda_{em} = \lambda_{em}$  (in an organic solvent)  $- \lambda_{em}$  (in DMSO).

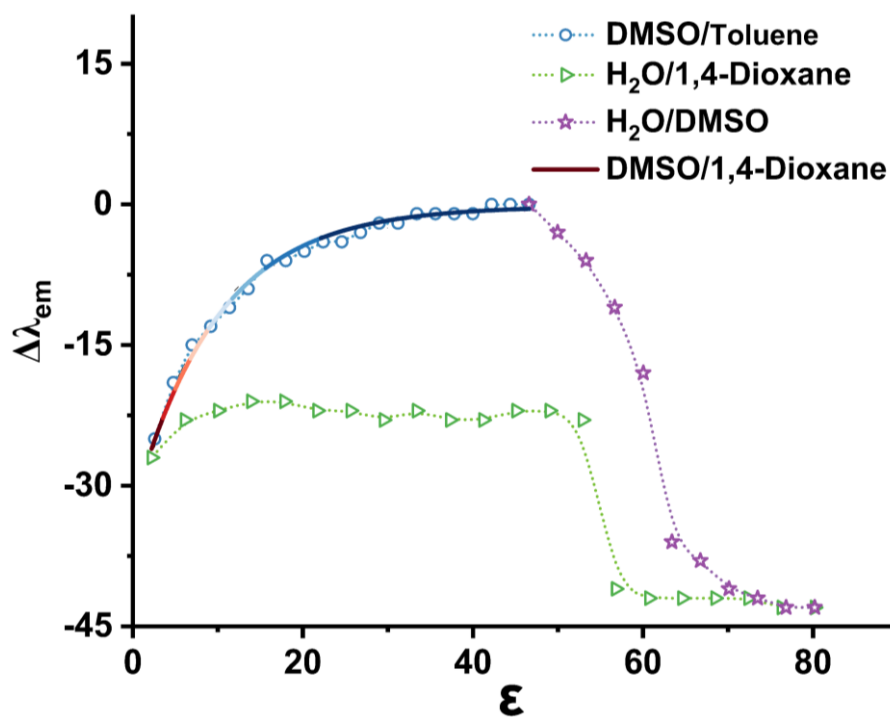

**Fig. S5** The relationships between  $\Delta\lambda_{em}$  with the dielectric constants of solvents in various mixture systems.  $\Delta\lambda_{em} = \lambda_{em} (\text{in an organic solvent}) - \lambda_{em} (\text{in DMSO})$ .



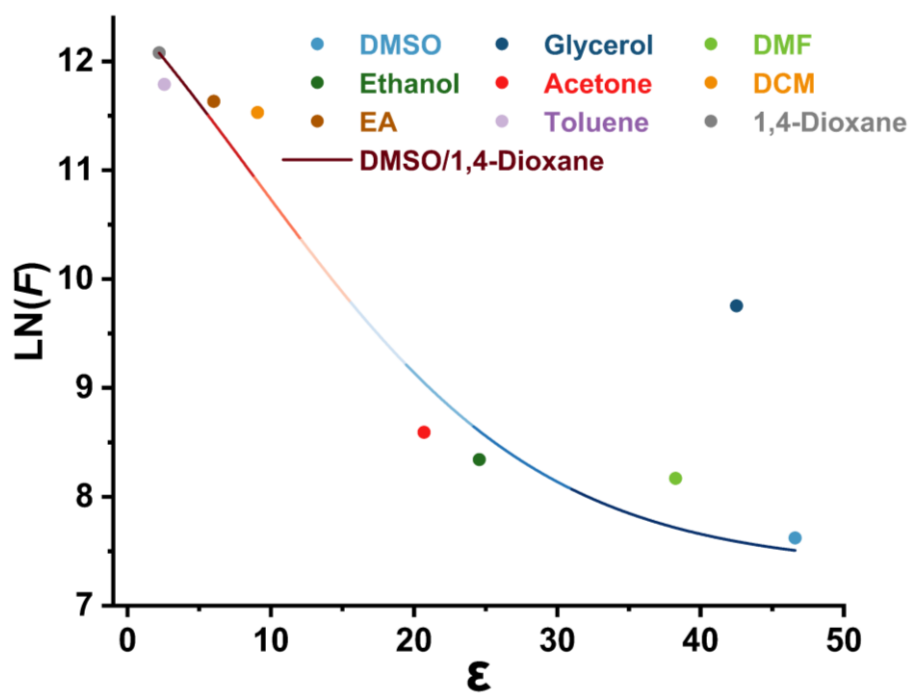

**Fig. S6** The relationships between LN( $F$ ) and the dielectric constants of solvents.  $F$  stands for the fluorescence intensities of 10  $\mu$ M BTHO at 493 nm.  $\lambda_{\text{ex}} = 405$  nm.

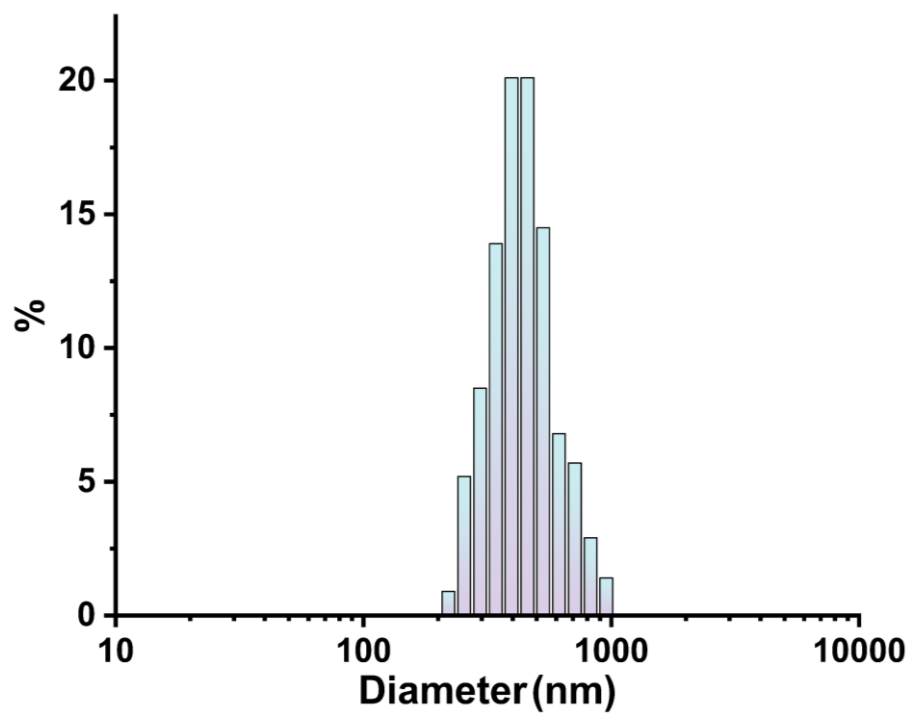

**Fig. S7** The distribution of the hydrated particle size for 10  $\mu\text{M}$  BTHO in aqueous medium.

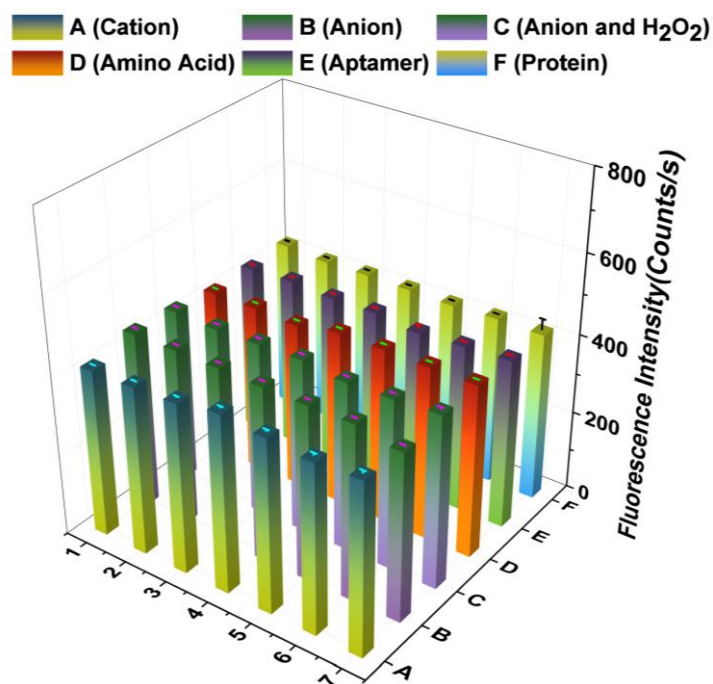

**Fig. S8** The selectivity assessment for 10  $\mu\text{M}$  BTMO in PB/DMSO (1:1, v/v) with 0.01 M phosphate and pH 7.40 against various common interfering substances. Excitation and emission were set at 405 and 493 nm, respectively. A1,  $\text{Na}^+$  (10 mM); A2,  $\text{K}^+$  (140 mM); A3,  $\text{Mg}^{2+}$  (1 mM); A4,  $\text{Ba}^{2+}$  (1 mM); A5,  $\text{Li}^+$  (1 mM); A6,  $\text{Ni}^{2+}$  (1 mM); A7,  $\text{Er}^{3+}$  (1 mM); B1,  $\text{F}^-$  (1 mM); B2,  $\text{Cl}^-$  (1 mM); B3,  $\text{Br}^-$  (1 mM); B4,  $\text{I}^-$  (1 mM); B5,  $\text{SO}_3^{2-}$  (1 mM); B6,  $\text{SO}_4^{2-}$  (1 mM); B7,  $\text{HS}^-$  (1 mM); C1,  $\text{NO}_2^-$  (1 mM); C2,  $\text{NO}_3^-$  (1 mM); C3,  $\text{HCO}_3^-$  (1 mM); C4,  $\text{Ac}^-$  (1 mM); C5,  $\text{ClO}_4^-$  (1 mM); C6,  $\text{ClO}^-$  (1 mM); C7,  $\text{H}_2\text{O}_2$  (1 mM); D1, Glu (1 mM); D2, GSH (1 mM); D3, Cys (1 mM); D4, Tyr (1 mM); D5, Lys (1 mM); D6, His (1 mM); D7, Ala (1 mM); E1, DNA 1 (100  $\mu\text{M}$ ); E2, DNA 2 (100  $\mu\text{M}$ ); E3, DNA 3 (100  $\mu\text{M}$ ); E4, DNA 4 (100  $\mu\text{M}$ ); E5, DNA 5 (100  $\mu\text{M}$ ); E6, RNA 1 (10  $\mu\text{M}$ ); E7, RNA 2 (50  $\mu\text{M}$ ); F1, NTR (1 mg/L); F2, LDH (1 mg/L); F3, TB (1 mg/L); F4, Try (1 mg/L); F5, BSA (1 mg/L); F6, Hb (1 mg/L); F7, Cyt C (1 mg/L).

DNA 1 (bglf):

TAATACGACTCACTATAAGTCGCAGGAGTCGGGGGCGCAGAT;

DNA 2 (anti-bglf):

ATGTTATCTGCGCCCCGACTCCTGCGACTTATAGTGAGTCGTA;

DNA 3 (anti-B30):

TGCACCACCACCACCACCACCACCACCACCAGTCGCA;

DNA 4 (anti-B12):

AGTCGCAGGAGTCGGGGGCGCAGATAACATTTTTTTTCCC;

DNA 5 (anti-B30G):

ACCACCACCACCACCACCACCACCACCTGTGCGCAGGA;

RNA 1 (miR10b):

UACCCUGUAGAACCGAAUUUGUG;

RNA 2 (miR21):

UAGCUUAUCAGACUGAUGUUGA.

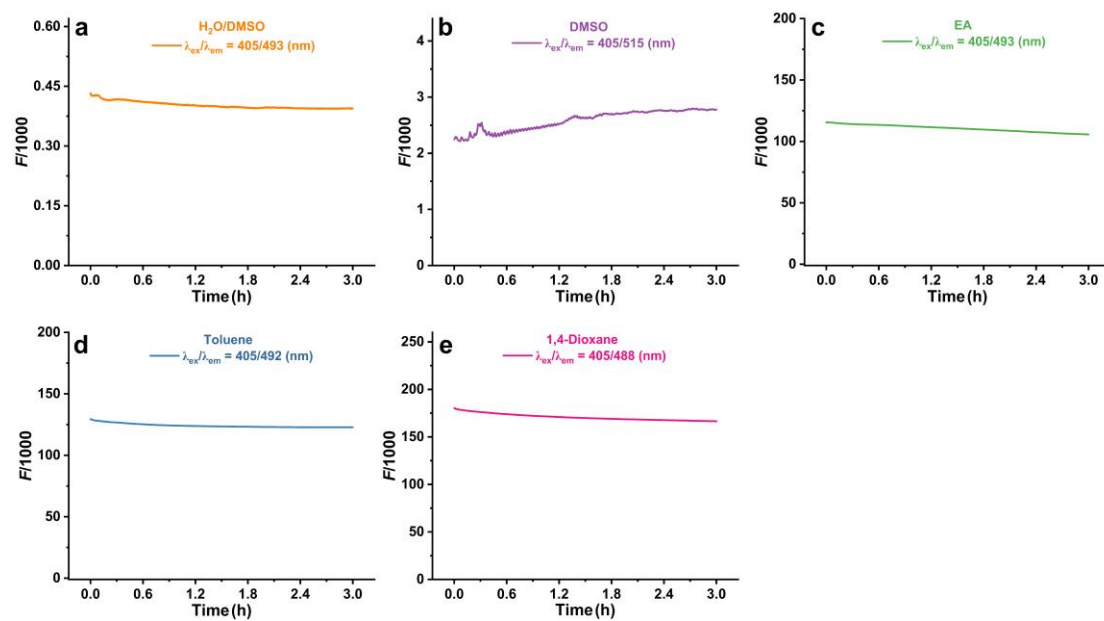

**Fig. S9** The photostability appraisal for 10  $\mu\text{M}$  BTHO in H<sub>2</sub>O/DMSO (1:1, v/v, **a**), DMSO (**b**), EA(**c**), toluene (**d**) and 1,4-dioxane (**e**).

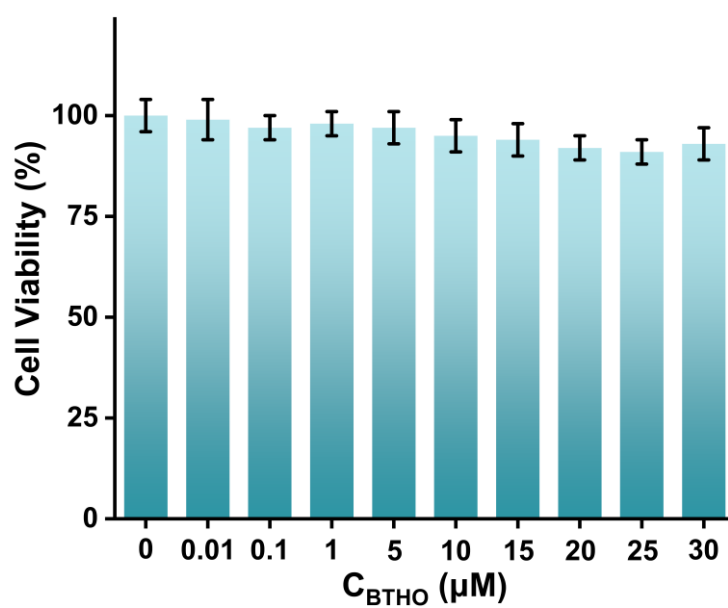

**Fig. S10** MTT assay results of live NCM460 cells in the presence of BTMO at various concentrations.

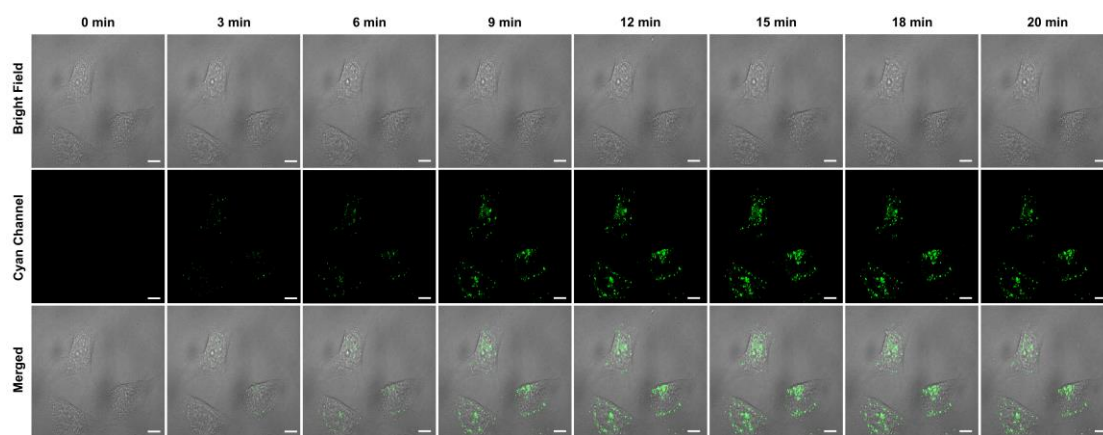

**Fig. S11** The time-dependent fluorescence images of NCM460 cells after introducing 5  $\mu$ M BTMO. Fluorescence emissions at the cyan channel (pseudo color) were collected at  $\lambda_{\text{ex}}/\lambda_{\text{em}}=405/(440-540)$  nm. Scale bar: 10  $\mu$ m.

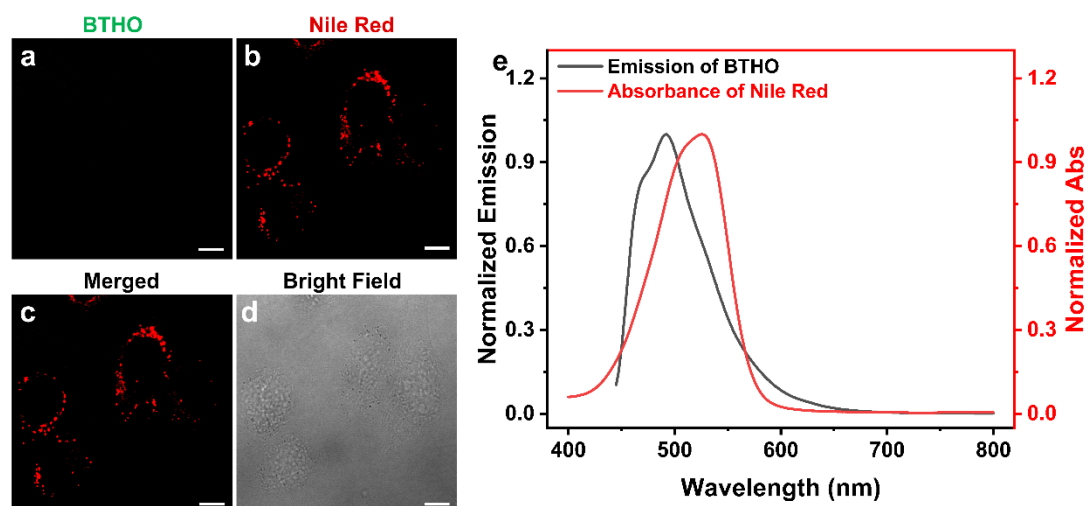

**Fig. 12** (a-d) The confocal imaging of NCM460 cells. (a) After staining by 5  $\mu\text{M}$  BTHO, (b) co-staining by 5  $\mu\text{M}$  Nile Red, (c) the merged image, (d) the bright field image. The fluorescence images were obtained on an Olympus FV1200 confocal laser scanning microscope with the cyan channel ( $\lambda_{\text{ex}}/\lambda_{\text{em}}=405/(410\text{-}485\text{ nm})$ ) for BTHO, and the red channel ( $\lambda_{\text{ex}}/\lambda_{\text{em}}=488/(625\text{-}725\text{ nm})$ ) for Nile Red. Scale bars: 10  $\mu\text{m}$ . (e) The fluorescence emission spectrum of BTHO (10  $\mu\text{M}$ ) in glyceryl trioleate under excitation with  $\lambda_{\text{ex}}=425\text{ nm}$  and the absorption spectrum of Nile Red (10  $\mu\text{M}$ ) in glyceryl trioleate.

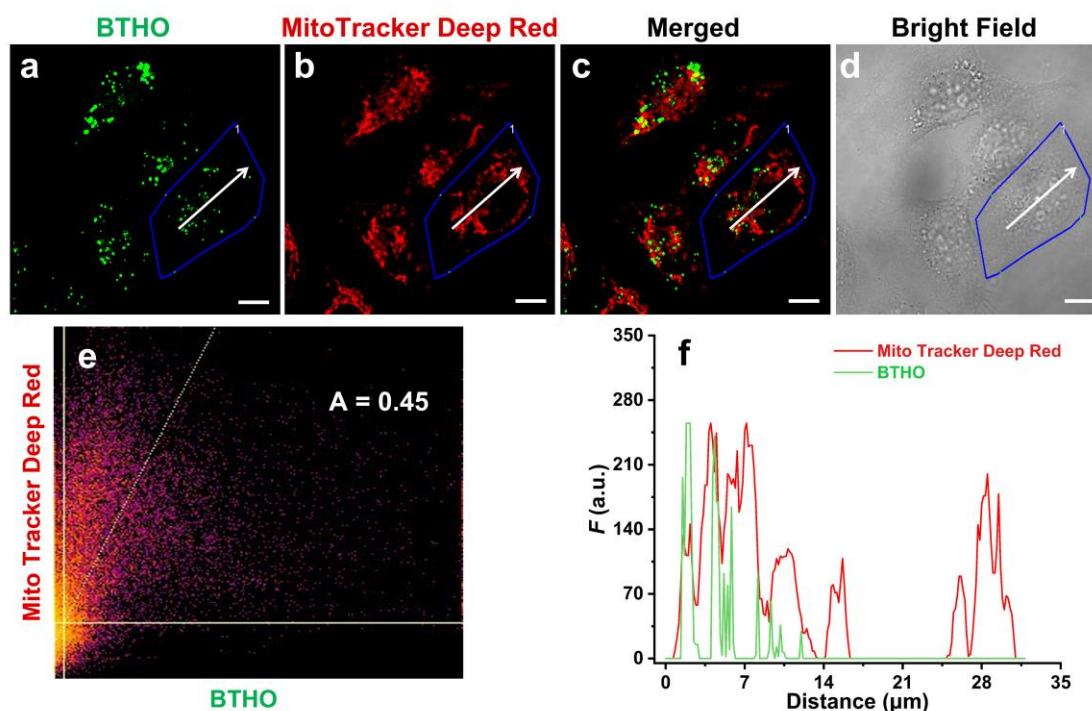

**Fig. S13** Confocal fluorescence images of NCM460 cells. (a) After staining by 5  $\mu\text{M}$  BTHO, (b) staining by 2  $\mu\text{M}$  Mito Tracker Deep Red, (c) the merged image, (d) the bright field image. (e) The correlation of intensity distribution of BTHO and Mito Tracker Deep Red (Pearson Correlation Coefficient,  $A=0.45$ ) within the blue ROI. (f) Intensity profile of the linear regions of interest across the NCM460 cells (the white arrow, sectional view). The fluorescence images were obtained on an Olympus FV1200 confocal laser scanning microscope with the cyan channel at  $\lambda_{\text{ex}}/\lambda_{\text{em}}=405/(440-540)$  nm for BTHO, and the deep red channel at  $\lambda_{\text{ex}}/\lambda_{\text{em}}=635/(640-725)$  nm for Mito Tracker Deep Red. Scale bars: 10  $\mu\text{m}$ .



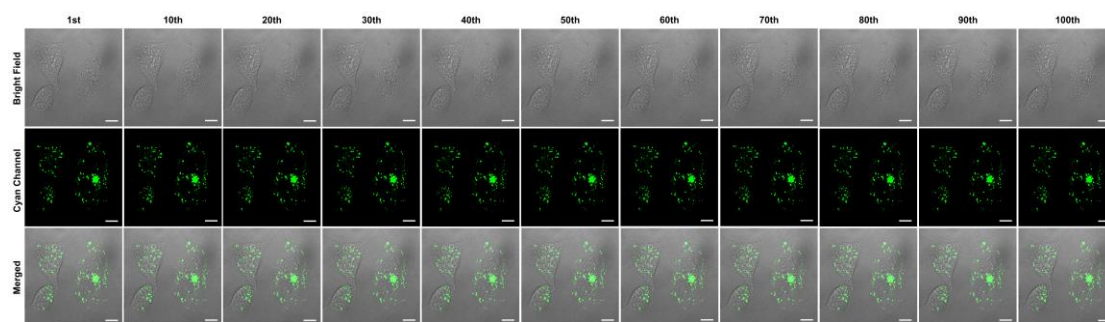

**Fig. S14** The time-dependent fluorescence images of NCM460 cells pre-treated with 5  $\mu\text{M}$  BTHO. Fluorescence emissions at the cyan channel (pseudo color) were collected at  $\lambda_{\text{ex}}/\lambda_{\text{em}}=405/(440-540)$  nm. Scale bar: 10  $\mu\text{m}$ . Fixed 405 laser power:  $50 \times 25\% = 12.5$  mW.

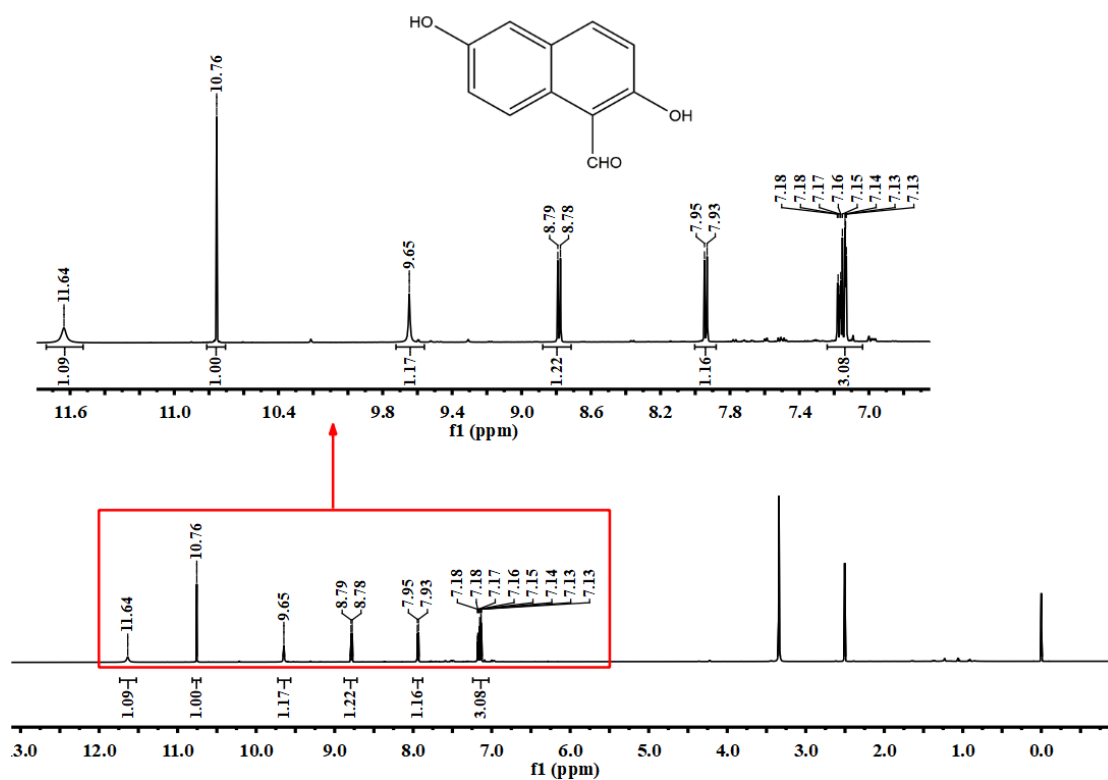

**Fig. S15**  $^1\text{H}$  NMR spectra of 2,6-dihydroxy-1-naphthaldehyde in  $\text{d}^6$ -DMSO.

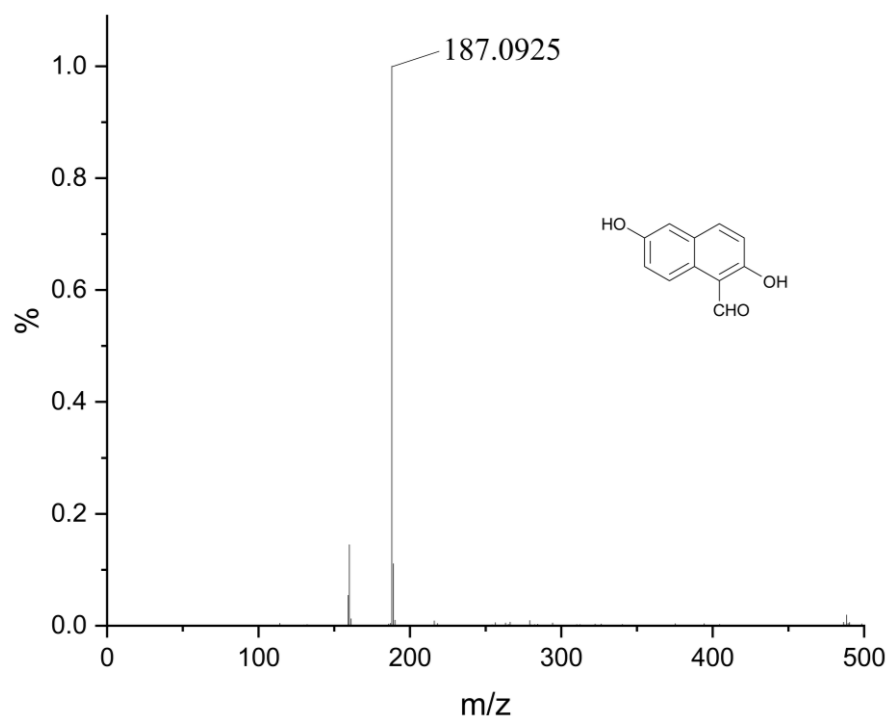

**Fig S16** The mass spectra of 2,6-dihydroxy-1-naphthaldehyde ( $[M]^-$ ).

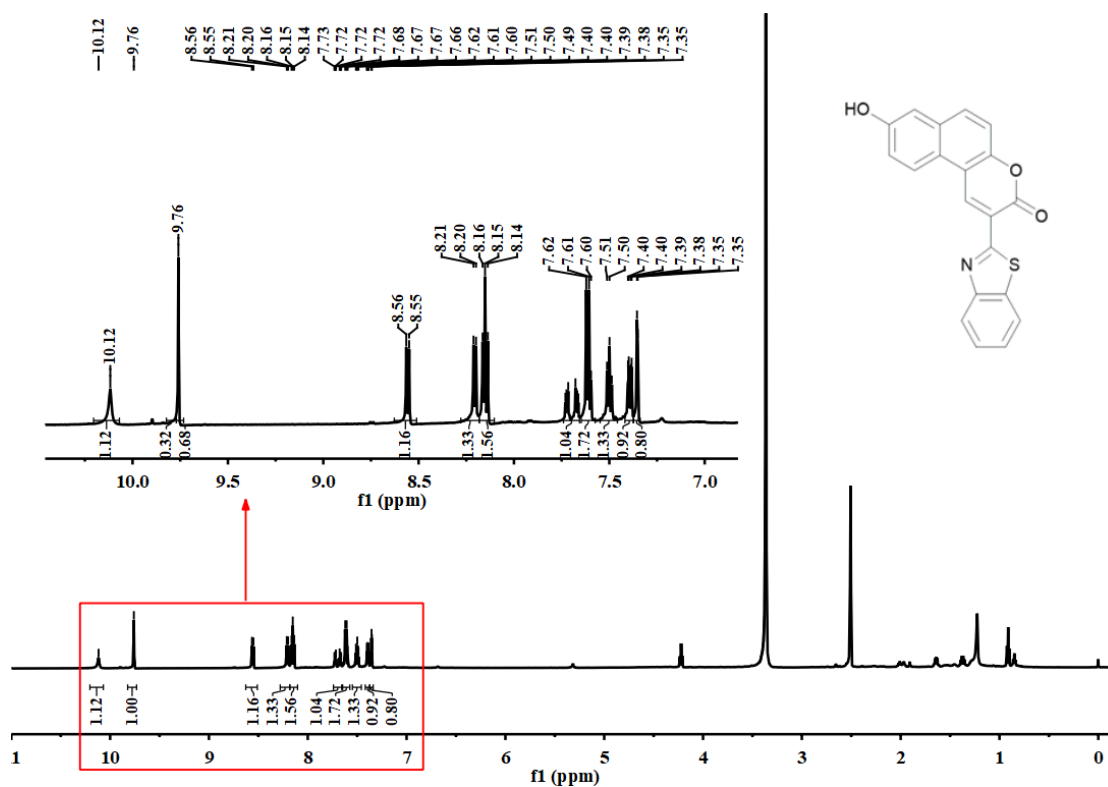

Fig. S17 <sup>1</sup>H NMR spectra of BTHO in d<sup>6</sup>-DMSO.

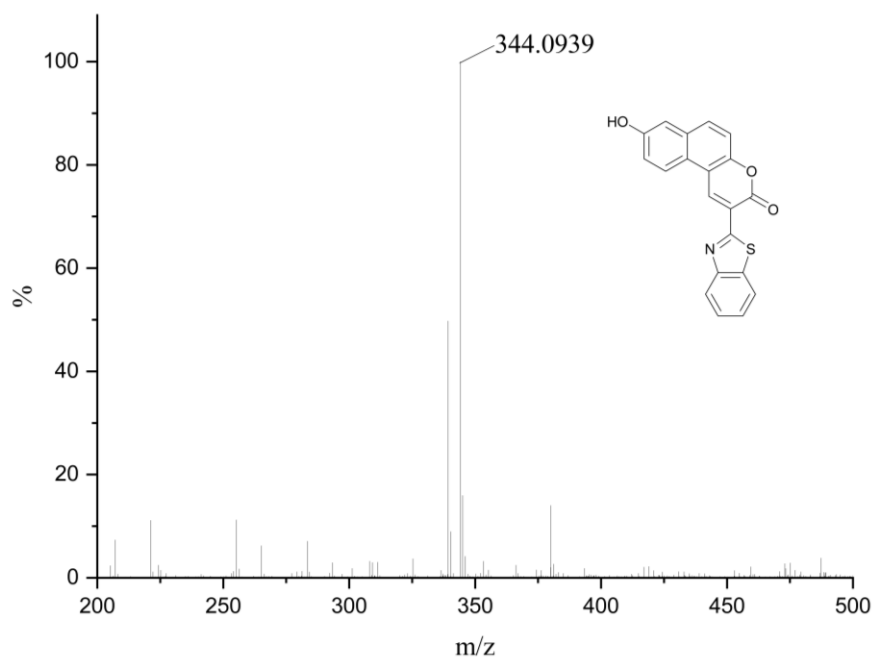

**Fig. S18** The mass spectra of BTMO ([M]<sup>-</sup>).

## Reference

1. C. Dax, F. Duffieux, N. Chabot, M. Coincon, J. Sygusch, P. A. M. Michels and C. Blonski, *Journal of Medicinal Chemistry*, 2006, 49, 1499-1502.
2. S. Sarkar, M. Santra, S. Singha, Y. W. Jun, Y. J. Reo, H. R. Kim and K. H. Ahn, *Journal of Materials Chemistry B*, 2018, 6, 4446-4452.
3. W. H. Melhuish, *The Journal of Physical Chemistry*, 1961, 65, 229-235.
4. J. B. Grimm and L. D. Lavis, *Nature Methods*, 2022, 19, 149-158.
5. M. K. Singh, H. Pal, A. C. Bhasikuttan and A. V. Sapre, *Photochemistry and Photobiology*, 1998, 68, 32-38.
6. B. Fang, Y. Shen, B. Peng, H. Bai, L. Wang, J. Zhang, W. Hu, L. Fu, W. Zhang, L. Li and W. Huang, *Angewandte Chemie International Edition*, 2022, 61, e202207188.
7. L. Yuan, W. Lin, K. Zheng and S. Zhu, *Accounts of Chemical Research*, 2013, 46, 1462-1473.
